# Supplementary material
Source: PubMed Central journal article supplement (PMC6104818)
Supplement: jexbio-221-177816-s1.pdf [file jexbio-221-177816-s1.pdf]

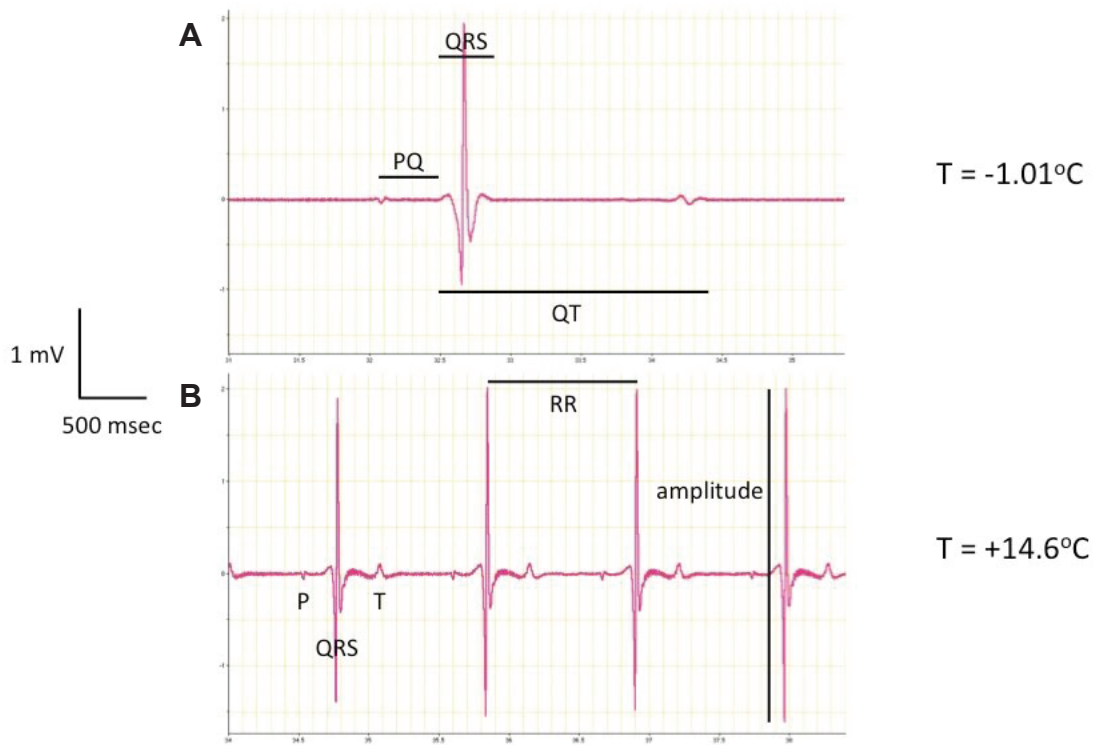

Fig. S1. Representative ECG trace of *N. coriiceps* at rest (A) and near  $CT_{\text{MAX}}$  (B). ECGs were recorded with minimal intervention using laterally staggered bipolar electrodes and collected using a PowerLab (AD Instruments, Oxford, UK) with an animal bio-amplifier (1 kHz sampling, 5 Hz high pass filter), and analyzed using LabChart (AD Instruments, Oxford, UK). RR, inter-beat interval.

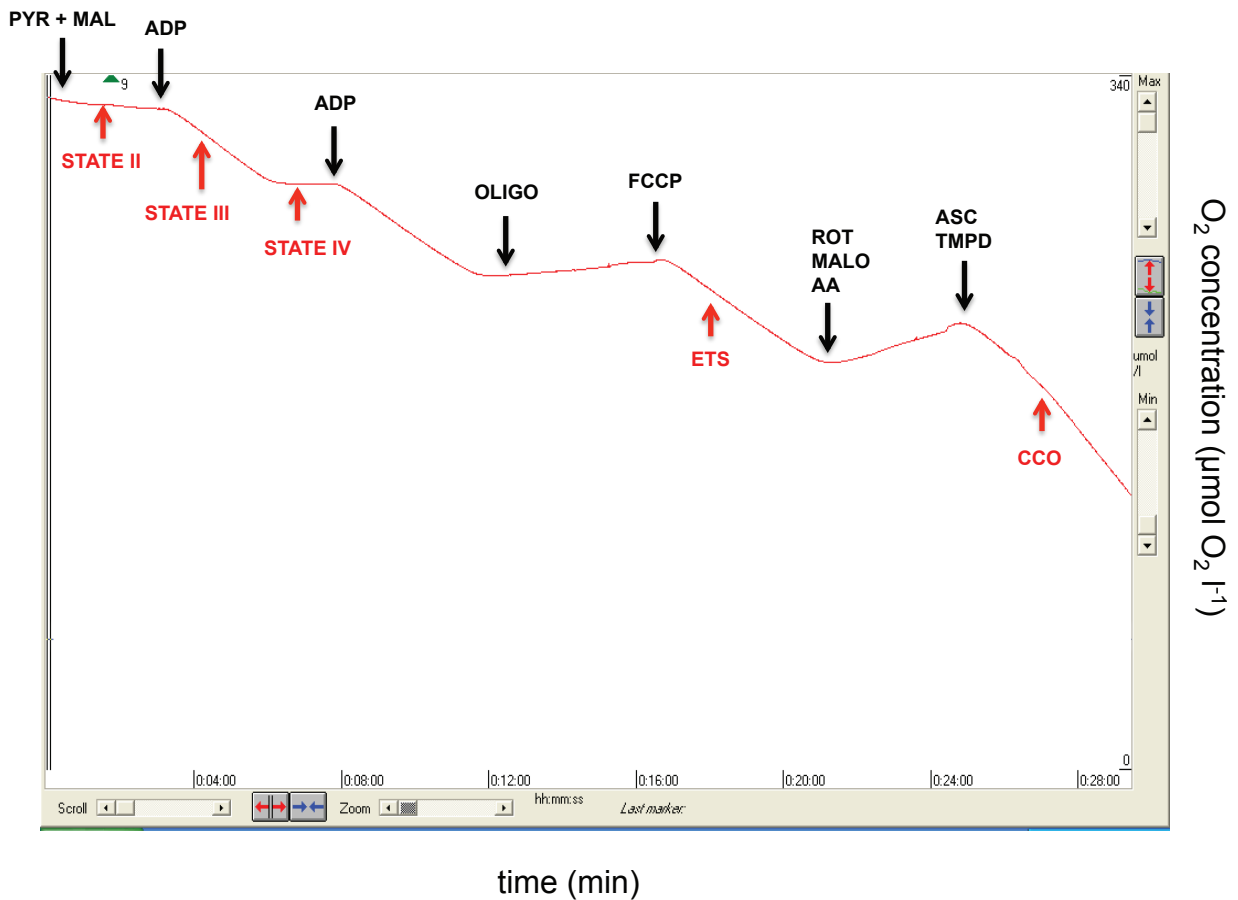

Fig. S2. Representative trace from a mitochondrial respiration assay. Mitochondria were isolated from *N. coriiceps* exposed to CT<sub>max</sub> and measured at 2 °C. PYR, pyruvate; MAL, malate; OLIGO, oligomycin; ROT, rotenone; MALO, malonate; AA, antimycin A; ASC, ascorbate; CCO, cytochrome c oxidase.
